# Supplementary material for: Spatial and temporal population genetic analysis of Semaprochilodus insignis (Prochilodontidae), an overexploited fish from the Amazon basin
Source: PeerJ journal article supplement (doi:10.7717/peerj.15503), 2023-06-20
Supplement: FigureS1.pdf [file FigureS1.pdf]

# L(K)

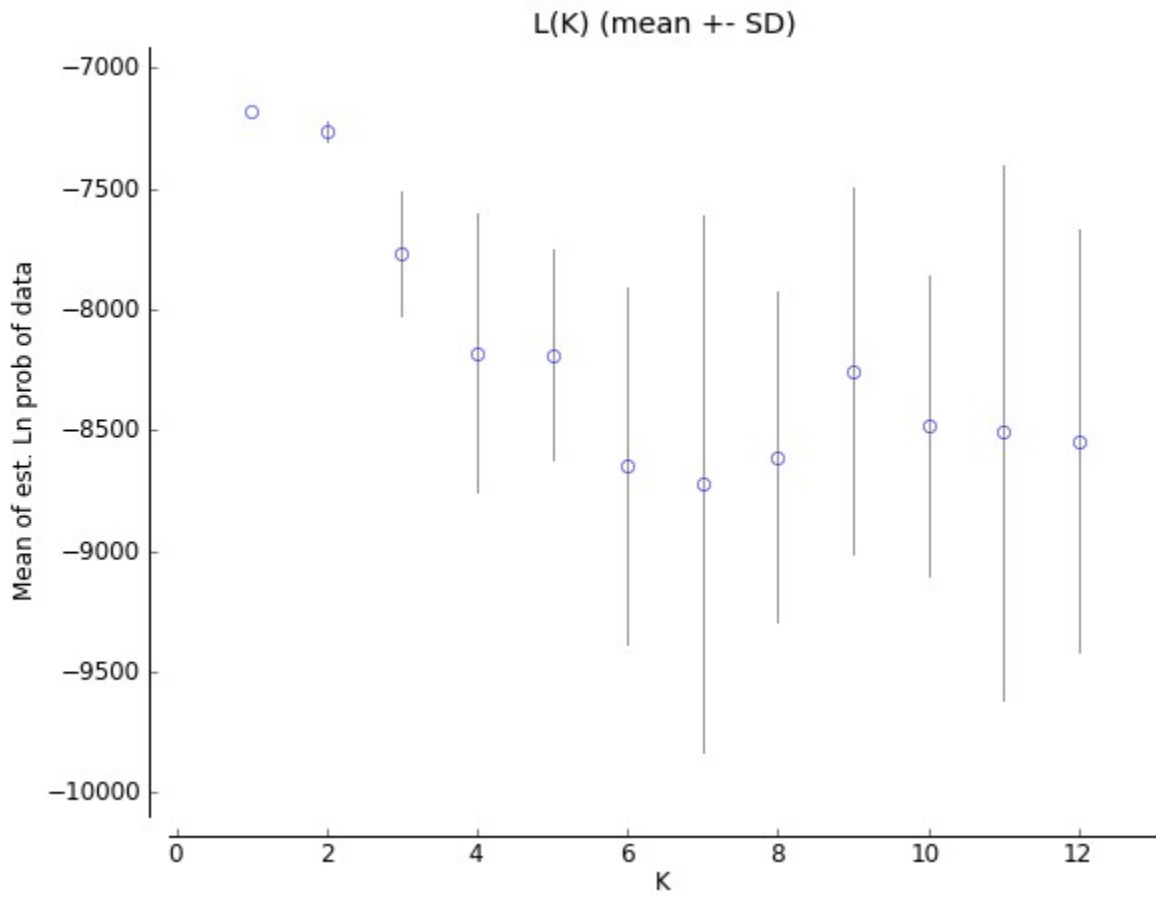

**Supplemental Figure S1. The maximum K value estimated for *Semaprochilodus insignis* based in Evanno method.**
